# Supplementary material
Source: PubMed Central journal article supplement (PMC4189882)
Supplement: viru-5-761-s01.pdf [file viru-5-761-s01.pdf]

## **Supplemental Material to:**

**Sabrina Höfling, Julia Scharnert, Christoph Cromme,  
Jessica Bertrand, Thomas Pap, M Alexander Schmidt,  
and Christian Rüter**

**Manipulation of pro-inflammatory cytokine production  
by the bacterial cell-penetrating effector protein YopM  
is independent of its interaction with host cell kinases  
RSK1 and PRK2**

**Virulence 2014; 5 (6)**

**<http://dx.doi.org/10.4161/viru.29062>**

**<http://www.landesbioscience.com/journals/virulence/article/29062/>**

|                                    |     |                                                                                    |     |
|------------------------------------|-----|------------------------------------------------------------------------------------|-----|
| <i>Y. pseudotuberculosis</i> PB1/+ | 1   | MFINPRNVSNTFLQQLRHSNLTMPVEAENVKSKTEYYNAWSEWERNAPPGNGEQREMAVSRLRDCLDRQAHELELNN      | 80  |
| <i>Y. pestis</i> KIM10+            | 1   | MFINPRNVSNTFLQQLRHSNLTMPVEAENVKSKTEYYNAWSEWERNAPPGNGEQREMAVSRLRDCLDRQAHELELNN      | 80  |
| <i>Y. enterocolitica</i> 8081      | 1   | MFITPRNVSNTFLQQLRHSNLTMPVEAENVKSKTEYYNAWAVWERNAPPGNGEQREMAVSRLRDCLDRQAHELELNN      | 80  |
| <i>Y. pseudotuberculosis</i> PB1/+ | 81  | LglsslpelpphleslvascnsltelpelpqslkslqvennNLKALPDLPPSLKKLHVRENDLTDPELPQSLESRLVDN    | 160 |
| <i>Y. pestis</i> KIM10+            | 81  | L-----GLSSLELPHPHLESLVASCNSLTELPELPQSLKSLVDN                                       | 120 |
| <i>Y. enterocolitica</i> 8081      | 81  | L-----GLSSLELPHPHLESLVASCNSLTELPELPQSLKSLQVDN                                      | 120 |
| <i>Y. pseudotuberculosis</i> PB1/+ | 161 | NNLKALSDLPPLSLEYLTASSNKLEELPELQNLPFLLAAIYadnnlletlpdlppsllklhvrendltdlpelpqsleslQV | 240 |
| <i>Y. pestis</i> KIM10+            | 121 | NNLKALSDLPPLSLEYLTASSNKLEELPELQNLPFLLAAIYADNNLSLKKLPDLPL-----DV                    | 160 |
| <i>Y. enterocolitica</i> 8081      | 121 | NNLKALSDLPPLSLEYLTASSNKLEELPELQNLPFLLAAIYADNNLSLKKLPDLPL-----DV                    | 160 |
| <i>Y. pseudotuberculosis</i> PB1/+ | 241 | DNNNLKALSDLPPLSLEYLTASSNKLEELPELQNLPFLLAAIYADNNLLETLPDLPPHleilvasynsltelpelpqslksl | 320 |
| <i>Y. pestis</i> KIM10+            | 161 | DNNSLKKLPDLPPSLEFLAAGNNQLEELPELQNLPFLLAAIYADNNLSLKKLPDLPL-----                     | 215 |
| <i>Y. enterocolitica</i> 8081      | 161 | DNNSLKKLPDLPPSLEFLAAGNNQLEELPELQNLPFLLAAIYADNNLSLKKLPDLPL-----                     | 215 |
| <i>Y. pseudotuberculosis</i> PB1/+ | 321 | rvdnnnlkalsdlppSLEYLTASSNKLEELPELQNLPFLLAAIYADNNLLETLPDLPPSLKKLHVRENDLTDPELPQSILT  | 400 |
| <i>Y. pestis</i> KIM10+            | 216 | -----SLESIVAGNNILEELPELQNLPFLLAAIYADNNLLETLPDLPPSLEALNVRDNYLTDPELPQSILT            | 280 |
| <i>Y. enterocolitica</i> 8081      | 216 | -----SLKTLNVRNLYLTD-----LPELPQSILTFLDVSDNIFSGLSLPPNLY                              | 258 |
| <i>Y. pseudotuberculosis</i> PB1/+ | 401 | FLDVSDDNISGLSELPPNLYLDASSNEIRSLCDLPPSLVDLNVKSNQSELPALPPHLERLIASFNYLAEVPELPQNLK     | 480 |
| <i>Y. pestis</i> KIM10+            | 281 | FLDVSENFISGLSELPPNLYLDASSNEIRSLCDLPPSLEELNVSNKLIELPALPPRERLIASFNHLAEVPELPQNLK      | 360 |
| <i>Y. enterocolitica</i> 8081      | 259 | YLDASSNGIRSLCDLPPSLVELDVRDNLIELPALPPHLERLIASLNHLAEVP-----ELPQNLK                   | 318 |
| <i>Y. pseudotuberculosis</i> PB1/+ | 481 | QLHVEQNALREFPDIPESELEEMDSERVVDPYEFAHETTDKLEDDVFE                                   | 529 |
| <i>Y. pestis</i> KIM10+            | 361 | QLHVEYNPLREFPDIPESELEEMDSERVVDPYEFAHETTDKLEDDVFE                                   | 409 |
| <i>Y. enterocolitica</i> 8081      | 319 | QLHVEHNALREFPDIPESELEEMDSERVVDPYEFAHETTDKLEDDVFE                                   | 367 |

**Figure S1.** Amino acid alignment of YopM from *Y. pseudotuberculosis* PB1/+, *Y. pestis* KIM 10+, and *Y. enterocolitica* 8081 performed with the help of the online constraint-based multiple alignment tool (COBALT) from NCBI using standard parameters.

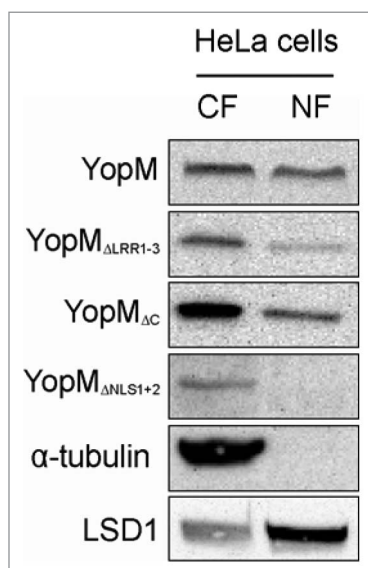

**Figure S2.** Immunoblot of subcellular fractionations of HeLa cells incubated with different truncated versions of rYopM for 3 h at 37 °C. In order to assess their purity, fractions were analyzed using antibodies against  $\alpha$ -tubulin (cytosol) and LSD1 (nucleus). rYopM partition was assessed using a YopM-specific polyclonal antibody. CF, cytosolic fraction; NF, nuclear fraction.

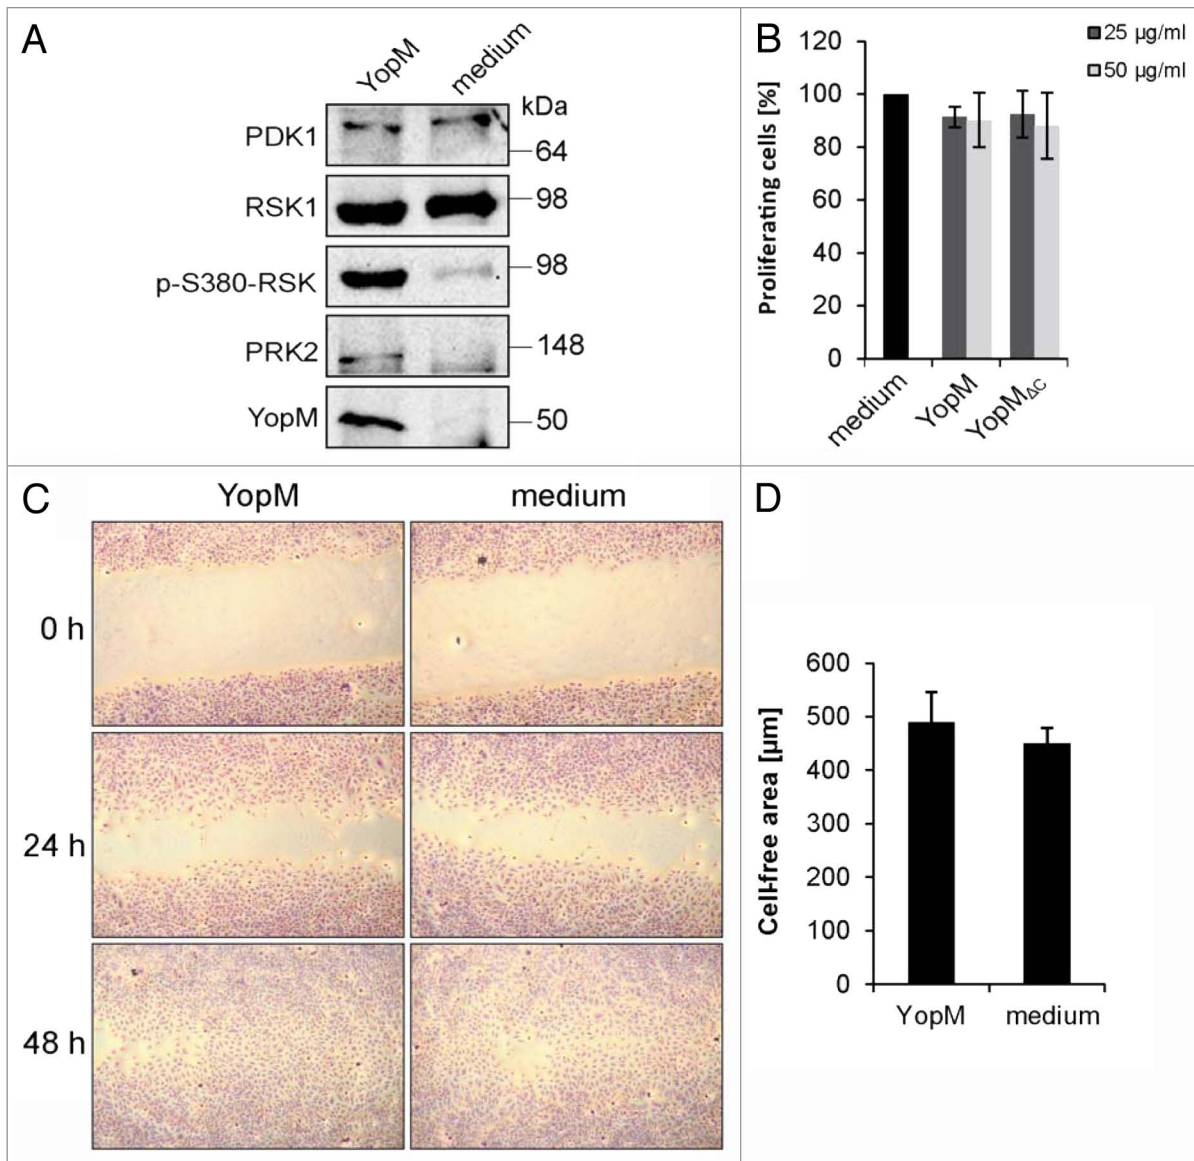

**Figure S3.** (A) rYopM does not interfere with recruitment of PDK1 to RSK1. HeLa cells were starved and incubated with or without 25  $\mu\text{g/ml}$  rYopM for 16 h at 37  $^{\circ}\text{C}$ . RSK1 was immunoprecipitated by a specific antibody. PDK1 is recruited to RSK with or without rYopM to the same extent. (B) Cell proliferation assay of HeLa cells after incubation for 48 h with the indicated recombinant proteins (25  $\mu\text{g/ml}$  and 50  $\mu\text{g/ml}$ , respectively), performing each condition in triplicate. Proliferation of cells was analyzed using a colorimetric BrdU-Assay. Values were correlated to cells grown in absence of recombinant protein and expressed as mean percentage of proliferating cells. Error bars indicate SD.  $n = 3$  independent experiments. The Student  $t$  test revealed no significant difference between the means. (C) rYopM does not affect the migration rate of HeLa cells. Migration assay of rYopM-incubated HeLa cells at a cell-free gap. For the assay,  $1 \times 10^5$  cells were seeded in each well. The cell gap was generated by a stainless steel cylinder. The incubation with 25  $\mu\text{g/ml}$  rYopM was carried out for 0, 24, and 48 h. Control cells (-YopM) were incubated for the same period with culture medium. Subsequently, cells were fixed with Wright solution, and documentation was performed with a digital SLR camera and an inverted microscope (Axiovert 100, Carl Zeiss). (D) Densitometric quantification of the migration assay. The cell-free area after 24 h was quantified using ImageJ 1.44p (NIH). Error bars indicate SD;  $n = 3$ . The Student  $t$  test revealed no significant difference between the means.

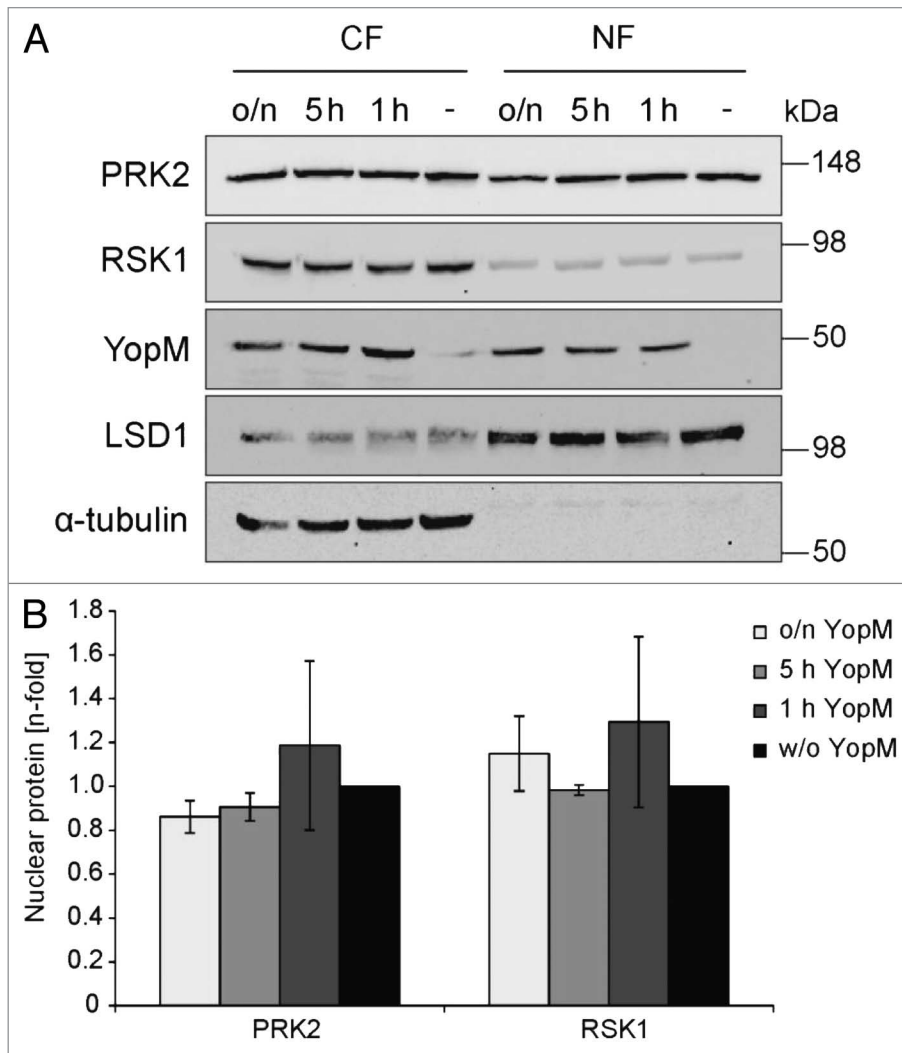

**Figure S4. (A)** Western blot analysis of cytosolic and nuclear distribution of RSK1 and PRK2 in the presence of rYopM. Immunoblot of subcellular fractionations of HeLa cells incubated with rYopM for 1 or 3 h, or overnight at 37 °C. In order to assess their purity, fractions were analyzed using antibodies against  $\alpha$ -tubulin (cytosol) and LSD1 (nucleus). **(B)** Comparison of the nuclear PRK2 and RSK1 ratio at 37 °C. Immunoblots were densitometrically analyzed using Lumi-Imager T1 and Lumi Analyst software (Roche Diagnostics), normalized by the LSD1 signals and the nuclear PRK2 and RSK1 ratio was calculated. Error bars indicate SD.  $n = 2$  independent experiments. The Student  $t$  test revealed no significant difference between the means.
